# Supplementary material
Source: PubMed Central journal article supplement (PMC5728342)

**Supplemental Data**

**Supplemental Table 1: Baseline Demographics in Patients with a History of AF**

|                                                                        | <b>History of AF and recurrence (n=13)</b> | <b>History of AF without recurrence (n=21)</b> |
|------------------------------------------------------------------------|--------------------------------------------|------------------------------------------------|
| <b>Age, median [range], years</b>                                      | 74 [57->89]                                | 68 [47-81]                                     |
| <b>Sex, male, n (%)</b>                                                | 10 (76.9)                                  | 17 (81)                                        |
| <b>Race, n (%)</b>                                                     |                                            |                                                |
| White                                                                  | 13 (100)                                   | 20 (95.2)                                      |
| Black                                                                  | 0                                          | 1 (4.8)                                        |
| <b>ECOG performance status, n (%)</b>                                  |                                            |                                                |
| 0-1                                                                    | 10 (76.9)                                  | 15 (75)                                        |
| 2                                                                      | 0                                          | 5 (25)                                         |
| 3-4                                                                    | 3 (23.1)                                   | 0                                              |
| <b>Primary Malignancy, n (%)</b>                                       |                                            |                                                |
| CLL                                                                    | 9 (69.2)                                   | 14 (66.7)                                      |
| MCL                                                                    | 1 (7.7)                                    | 4 (19)                                         |
| WM                                                                     | 0                                          | 2 (9.5)                                        |
| Others <sup>1</sup>                                                    | 3 (23.1)                                   | 1 (4.8)                                        |
| <b>CLL, Rai stage (n=9 and 14, respectively), n (%)</b>                |                                            |                                                |
| 0 (Low risk)                                                           | 0                                          | 0                                              |
| 1-2 (Intermediate risk)                                                | 4 (44.4)                                   | 3 (21.4)                                       |
| 3-4 (High risk)                                                        | 5 (55.6)                                   | 11 (78.6)                                      |
| <b>CLL, risk stratification (n=9 and 14, respectively), n (%)</b>      |                                            |                                                |
| Del11q22                                                               | 0                                          | 8 (61.5)                                       |
| Trisomy 12                                                             | 0                                          | 0                                              |
| Del13q14                                                               | 7 (77.8)                                   | 5 (38.5)                                       |
| Del17p13                                                               | 3 (33.3)                                   | 2 (15.4)                                       |
| IGHV mutated, >2%, n (%)                                               | 4 (50)                                     | 11 (91.7)                                      |
| <b>Cancer stage (MCL, WM, other), (n=4 and 7, respectively), n (%)</b> |                                            |                                                |
| 3-4                                                                    | 4 (100)                                    | 7 (100)                                        |
| <b>Treatment History, n (%)</b>                                        |                                            |                                                |
| Prior therapies, median [range]                                        | 2 (1-5)                                    | 2 [0-10]                                       |
| Untreated                                                              | 0                                          | 3 (14.3)                                       |
| Prior anthracycline                                                    | 2 (15.4)                                   | 6 (28.6)                                       |
| Prior autologous HSCT                                                  | 0                                          | 2 (9.5)                                        |
| Prior allogeneic HSCT                                                  | 0                                          | 0                                              |
| <b>Concomitant therapies with ibrutinib, n (%)</b>                     |                                            |                                                |
| Chemotherapy, n (%)                                                    | 3 (23.1)                                   | 6 (28.6)                                       |
| Anthracyclines, n (%)                                                  | 0                                          | 0                                              |
| MoAb therapy, n (%)                                                    | 3 (23.1)                                   | 4 (19)                                         |

| <b>Baseline AF risk factors</b>                          |                |                |
|----------------------------------------------------------|----------------|----------------|
| Hypertension, n (%)                                      | 6 (46.2)       | 13 (61.9)      |
| Diabetes mellitus, n (%)                                 | 4 (30.8)       | 2 (9.5)        |
| Myocardial infarction, n (%)                             | 1 (7.7)        | 3 (14.3)       |
| Coronary artery disease, n (%)                           | 3 (23.1)       | 6 (28.6)       |
| Congestive heart failure, n (%)                          | 1 (7.7)        | 3 (14.3)       |
| Obstructive sleep apnea, n (%)                           | 0              | 5 (23.8)       |
| Valvular heart disease, n (%)                            | 2 (15.4)       | 1 (4.8)        |
| Hyperthyroidism, n (%)                                   | 0              | 0              |
| Coronary artery bypass graft, n (%)                      | 1 (7.7)        | 1 (4.8)        |
| Transient ischemic attack or stroke, n (%)               | 1 (7.7)        | 1 (4.8)        |
| Cardiac Murmur, n (%)                                    | 4 (30.8)       | 7 (33.3)       |
| Smoking, n (%)                                           | 7 (53.8)       | 10 (47.6)      |
| Baseline systolic BP, median [range], mmHg               | 124 [104-164]  | 129 [95-178]   |
| Baseline PR interval <sup>2</sup> , median [range], msec | 188 [142-262]  | 157 [112-210]  |
| <b>Predicted AF risk</b>                                 |                |                |
| FHS AF risk <sup>3</sup> , median [range], %             | 21.1 [3.3->30] | 14.6 [2.1->30] |
| Low risk (<10%), n (%)                                   | 3 (33.3)       | 7 (43.8)       |
| Intermediate risk (10-20%), n (%)                        | 1 (11.1)       | 6 (37.5)       |
| High risk (>20%), n (%)                                  | 5 (55.6)       | 3 (18.8)       |
| Missing data, n (%)                                      | 4 (30.8)       | 5 (23.8)       |

ECOG = Eastern Cooperative Oncology Group; CLL = chronic lymphocytic leukemia; MCL = mantle cell lymphoma; WM = Waldenström's macroglobulinemia; HSCT = hematopoietic stem cell transplant; MoAb = Monoclonal antibody; <sup>1</sup> Diffuse large B cell lymphoma, graft-versus host disease, marginal zone lymphoma, hairy cell leukemia, follicular lymphoma; BP = blood pressure, normal considered < 120mmHg; <sup>2</sup>Normal range = 120-200msec; FHS = Framingham Heart Study <sup>3</sup>FHS 10-year risk of first AF, calculated according to Schnabel et al using the following variables: age, sex, body mass index, systolic blood pressure, treatment for hypertension, PR interval, significant murmur, prevalent heart failure

**Supplemental Table 2: Baseline Demographics in Patients Treated on a Clinical Trial versus. Commercial Ibrutinib**

|                                                                           | <b>Clinical Trial<br/>(n=472)</b> | <b>Commercial<br/>(n=110)</b> | <b>p-value</b> |
|---------------------------------------------------------------------------|-----------------------------------|-------------------------------|----------------|
| <b>Age, median [range], years</b>                                         | 65 [23->89]                       | 65 [29->89]                   | 0.23           |
| <b>Sex, male, n (%)</b>                                                   | 336 (71.2)                        | 70 (63.6)                     | 0.12           |
| <b>Race, n (%)</b>                                                        |                                   |                               |                |
| White                                                                     | 444 (94.1)                        | 96 (87.3)                     | 0.03           |
| Black                                                                     | 18 (3.8)                          | 13 (11.8)                     |                |
| <b>ECOG performance status, n (%)</b>                                     |                                   |                               |                |
| 0-1                                                                       | 447 (94.7)                        | 83 (75.4)                     | <0.01          |
| 2                                                                         | 23 (4.9)                          | 16 (15.7)                     |                |
| 3-4                                                                       | 1 (0.2)                           | 3 (3)                         |                |
| <b>Primary Malignancy, n (%)</b>                                          |                                   |                               |                |
| CLL                                                                       | 354 (75)                          | 79 (71.8)                     | <0.01          |
| MCL                                                                       | 43 (9.1)                          | 14 (12.7)                     |                |
| WM                                                                        | 2 (0.4)                           | 10 (9.1)                      |                |
| Others <sup>1</sup>                                                       | 73 (15.5)                         | 7 (6.4)                       |                |
| <b>CLL, Rai stage (n=354 and 79, respectively), n (%)</b>                 |                                   |                               |                |
| 0 (Low risk)                                                              | 3 (0.8)                           | 0                             | <0.01          |
| 1-2 (Intermediate risk)                                                   | 96 (27.1)                         | 22 (27.8)                     |                |
| 3-4 (High risk)                                                           | 255 (72)                          | 52 (65.8)                     |                |
| <b>CLL, risk stratification (n=354 and 79, respectively), n (%)</b>       |                                   |                               |                |
| Del11q22                                                                  | 111 (31.9)                        | 27 (36.5)                     | 0.44           |
| Trisomy 12                                                                | 68 (19.5)                         | 20 (27.8)                     | 0.12           |
| Del13q14                                                                  | 185 (53.2)                        | 34 (45.9)                     | 0.26           |
| Del17p13                                                                  | 144 (41.3)                        | 16 (21.9)                     | <0.01          |
| IGHV mutated, >2%, n (%)                                                  | 67 (21.6)                         | 11 (20)                       | 0.79           |
| <b>Cancer stage (MCL, WM, other), (n=118 and 31, respectively), n (%)</b> |                                   |                               |                |
| 3-4                                                                       | 83 (70.3)                         | 31 (100)                      | 0.08           |
| <b>Treatment History, n (%)</b>                                           |                                   |                               |                |
| Prior therapies, median [range]                                           | 3 [0-18]                          | 2 [0-9]                       | <0.01          |
| Untreated                                                                 | 32 (6.8)                          | 4 (4.5)                       | 0.39           |
| Prior anthracycline                                                       | 112 (23.7)                        | 22 (20)                       | 0.40           |
| Prior autologous HSCT                                                     | 31 (6.6)                          | 7 (6.4)                       | 0.74           |
| Prior allogeneic HSCT                                                     | 19 (4)                            | 2 (1.8)                       |                |
| <b>Concomitant therapies with ibrutinib, n (%)</b>                        |                                   |                               |                |
| Chemotherapy, n (%)                                                       | 159 (33.7)                        | 16 (14.5)                     | <0.01          |
| Anthracyclines, n (%)                                                     | 6 (1.3)                           | 3 (2.7)                       | 0.38           |
| MoAb therapy, n (%)                                                       | 131 (27.8)                        | 12 (10.9)                     | <0.01          |
| <b>Baseline AF risk factors</b>                                           |                                   |                               |                |
| Hypertension, n (%)                                                       | 200 (42.4)                        | 62 (56.4)                     | 0.01           |
| Diabetes mellitus, n (%)                                                  | 57 (12.1)                         | 19 (17.3)                     | 0.15           |

|                                                          |               |               |      |
|----------------------------------------------------------|---------------|---------------|------|
| Myocardial infarction, n (%)                             | 27 (5.7)      | 9 (8.2)       | 0.33 |
| Coronary artery disease, n (%)                           | 47 (10)       | 19 (17.3)     | 0.03 |
| Congestive heart failure, n (%)                          | 9 (1.9)       | 5 (4.5)       | 0.10 |
| Obstructive sleep apnea, n (%)                           | 31 (6.6)      | 15 (13.6)     | 0.01 |
| Valvular heart disease, n (%)                            | 16 (3.4)      | 6 (5.5)       | 0.31 |
| Hyperthyroidism, n (%)                                   | 4 (0.8)       | 1 (0.9)       | 0.95 |
| Coronary artery bypass graft, n (%)                      | 11 (2.3)      | 1 (0.9)       | 0.34 |
| Transient ischemic attack or stroke, n (%)               | 18 (3.8)      | 4 (3.6)       | 0.93 |
| Cardiac Murmur, n (%)                                    | 49 (10.4)     | 18 (16.4)     | 0.08 |
| Smoking, n (%)                                           | 216 (45.9)    | 46 (41.8)     | 0.44 |
| Baseline systolic BP, median [range], mmHg               | 130 [86-186]  | 127 [95-178]  | 0.38 |
| Baseline PR interval <sup>2</sup> , median [range], msec | 156 [80-302]  | 153 [116-220] | 0.24 |
| <b>Predicted AF risk</b>                                 |               |               |      |
| FHS AF risk <sup>3</sup> , median [range], %             | 6.7 [0.2->30] | 8.7 [0.4->30] | 0.26 |
| Low risk (<10%), n (%)                                   | 232 (64.1)    | 25 (56.8)     | 0.50 |
| Intermediate risk (10-20%), n (%)                        | 83 (22.9)     | 11 (25)       |      |
| High risk (>20%), n (%)                                  | 47 (13.0)     | 8 (18.2)      |      |
| Missing data, n (%)                                      | 110 (23.3)    | 66 (60)       |      |

ECOG = Eastern Cooperative Oncology Group; CLL = chronic lymphocytic leukemia; MCL = mantle cell lymphoma; WM = Waldenström's macroglobulinemia; HSCT = hematopoietic stem cell transplant; MoAb = Monoclonal antibody; <sup>1</sup> Diffuse large B cell lymphoma, graft-versus host disease, marginal zone lymphoma, hairy cell leukemia, follicular lymphoma; BP = blood pressure, normal considered < 120mmHg; <sup>2</sup>Normal range = 120-200msec; FHS = Framingham Heart Study <sup>3</sup>FHS 10-year risk of first AF, calculated according to Schnabel et al using the following variables: age, sex, body mass index, systolic blood pressure, treatment for hypertension, PR interval, significant murmur, prevalent heart failure

**Supplemental Table 3: Baseline Population Demographics Based on AF Status**

|                                                      | <b>AF (n=76)</b> | <b>No AF (n=506)</b> |
|------------------------------------------------------|------------------|----------------------|
| <b>Age, median [range], years</b>                    | 70 [48->89]      | 64 [23->89]          |
| <b>Sex, male, n (%)</b>                              | 64 (84.2)        | 342 (67.6)           |
| <b>Race, n (%)</b>                                   |                  |                      |
| White                                                | 71 (93.4)        | 469 (92.7)           |
| Black                                                | 2 (2.6)          | 29 (5.7)             |
| Others                                               | 3 (3.9)          | 8 (1.6)              |
| <b>ECOG performance status, n (%)</b>                |                  |                      |
| 0-1                                                  | 68 (89.5)        | 462 (92.9)           |
| 2                                                    | 5 (6.6)          | 34 (6.8)             |
| 3-4                                                  | 3 (3.9)          | 1 (0.2)              |
| <b>Primary Malignancy, n (%)</b>                     |                  |                      |
| CLL                                                  | 61 (80.3)        | 372 (73.5)           |
| MCL                                                  | 6 (7.9)          | 51 (10.1)            |
| WM                                                   | 1 (1.3)          | 11 (2.2)             |
| Others <sup>1</sup>                                  | 8 (10.5)         | 72 (14.2)            |
| <b>CLL, Rai stage (n=433), n (%)</b>                 |                  |                      |
| 0 (Low risk)                                         | 1 (1.6)          | 2 (0.5)              |
| 1-2 (Intermediate risk)                              | 15 (24.6)        | 103 (27.7)           |
| 3-4 (High risk)                                      | 45 (73.7)        | 262 (70.4)           |
| Unknown                                              | 0                | 5 (1.3)              |
| <b>CLL, risk stratification (n=433), n (%)</b>       |                  |                      |
| Del11q22                                             | 17 (28.3)        | 121 (33.4)           |
| Trisomy 12                                           | 17 (28.3)        | 71 (19.7)            |
| Del13q14                                             | 37 (61.7)        | 182 (50.3)           |
| Del17p13                                             | 19 (31.7)        | 141 (39)             |
| IGHV mutated, >2%, n (%)                             | 16 (29.6)        | 62 (19.9)            |
| <b>Cancer stage (MCL, WM, other), (n=149), n (%)</b> |                  |                      |
| 1-2                                                  | 0                | 8 (5.9)              |
| 3-4                                                  | 13 (86.6)        | 101 (75.3)           |
| Not applicable, unknown                              | 2 (13.3)         | 25 (18.7)            |
| <b>Treatment History, n (%)</b>                      |                  |                      |
| Prior therapies, median [range]                      | 3 [0-18]         | 3 [0-13]             |
| Untreated                                            | 5 (6.6)          | 32 (6.3)             |
| Prior anthracycline                                  | 11 (14.5)        | 123 (24.3)           |
| Prior autologous HSCT                                | 3 (3.9)          | 35 (6.9)             |
| Prior allogeneic HSCT                                | 1 (1.3)          | 20 (4)               |
| <b>Concomitant therapies with ibrutinib, n (%)</b>   |                  |                      |
| Chemotherapy, n (%)                                  | 22 (28.9)        | 153 (30.2)           |
| Anthracyclines, n (%)                                | 2 (2.6)          | 7 (1.4)              |
| <b>Baseline AF risk factors</b>                      |                  |                      |

|                                                          |                |                |
|----------------------------------------------------------|----------------|----------------|
| Hypertension, n (%)                                      | 36 (47.4)      | 226 (44.7)     |
| Diabetes mellitus, n (%)                                 | 16 (21.1)      | 60 (11.9)      |
| Myocardial infarction, n (%)                             | 8 (10.5)       | 28 (5.5)       |
| Coronary artery disease, n (%)                           | 13 (17.1)      | 53 (10.5)      |
| Congestive heart failure, n (%)                          | 3 (3.9)        | 11 (2.2)       |
| Obstructive sleep apnea, n (%)                           | 7 (9.2)        | 39 (7.7)       |
| Valvular heart disease, n (%)                            | 3 (3.9)        | 19 (3.8)       |
| Hyperthyroidism, n (%)                                   | 0              | 5 (1)          |
| Coronary artery bypass graft, n (%)                      | 4 (5.3)        | 8 (1.6)        |
| Transient ischemic attack or stroke, n (%)               | 2 (2.6)        | 20 (4)         |
| Cardiac Murmur, n (%)                                    | 15 (19.7)      | 52 (10.3)      |
| Smoking, n (%)                                           | 38 (50)        | 224 (44.4)     |
| Baseline systolic BP, median [range], mmHg               | 133 [90-168]   | 128 [86-186]   |
| Baseline PR interval <sup>2</sup> , median [range], msec | 158 [114-262]  | 156 [80-302]   |
| <b>Predicted AF risk</b>                                 |                |                |
| FHS AF risk <sup>3</sup> , median [range], %             | 13.5 [2.2->30] | 6.4 [0.02->30] |
| Low risk (<10%), n (%)                                   | 17 (35.4)      | 240 (67.0)     |
| Intermediate risk (10-20%), n (%)                        | 14 (29.2)      | 80 (22.4)      |
| High risk (>20%), n (%)                                  | 17 (35.4)      | 38 (10.6)      |
| Missing data, n (%)                                      | 28 (36.8)      | 148 (29.2)     |

ECOG = Eastern Cooperative Oncology Group; CLL = chronic lymphocytic leukemia; MCL = mantle cell lymphoma; WM = Waldenström's macroglobulinemia; HSCT = hematopoietic stem cell transplant; MoAb = Monoclonal antibody; <sup>1</sup> Diffuse large B cell lymphoma, graft-versus host disease, marginal zone lymphoma, hairy cell leukemia, follicular lymphoma; BP = blood pressure, normal considered < 120mmHg; <sup>2</sup>Normal range = 120-200msec; FHS = Framingham Heart Study <sup>3</sup>FHS 10-year risk of first AF, calculated according to Schnabel et al using the following variables: age, sex, body mass index, systolic blood pressure, treatment for hypertension, PR interval, significant murmur, prevalent heart failure

**Supplemental Table 4: Stroke prevention strategy by CHADS2 score<sup>1</sup>**

| CHADS2 Score <sup>1</sup>           | n  | Anticoagulant <sup>2</sup> + antiplatelet <sup>3</sup> , n (%) | Anticoagulant <sup>2</sup> only, n (%) | Antiplatelet <sup>3</sup> only, n (%) | None, n (%) |
|-------------------------------------|----|----------------------------------------------------------------|----------------------------------------|---------------------------------------|-------------|
| <b>All AF patients (n=76)</b>       |    |                                                                |                                        |                                       |             |
| <b>0</b>                            | 22 | 1 (5)                                                          | 3 (14)                                 | 11 (50)                               | 7 (32)      |
| <b>1</b>                            | 28 | 0                                                              | 13 (46)                                | 12 (43)                               | 3 (11)      |
| <b>2</b>                            | 15 | 1 (7)                                                          | 3 (20)                                 | 9 (60)                                | 2 (13)      |
| <b>3</b>                            | 8  | 0                                                              | 0                                      | 4 (50)                                | 4 (50)      |
| <b>4</b>                            | 3  | 0                                                              | 1 (33)                                 | 2 (67)                                | 0           |
| <b>p-value (trend)<sup>4</sup></b>  |    | 0.76                                                           | 0.68                                   | 0.53                                  | 0.84        |
| <b>Incident AF patients (n=63)</b>  |    |                                                                |                                        |                                       |             |
| <b>0</b>                            | 18 | 1 (6)                                                          | 3 (17)                                 | 8 (44)                                | 6 (33)      |
| <b>1</b>                            | 26 | 0 (0)                                                          | 13 (50)                                | 10 (38)                               | 3 (12)      |
| <b>2</b>                            | 12 | 0 (0)                                                          | 3 (25)                                 | 7 (58)                                | 2 (17)      |
| <b>3</b>                            | 5  | 0 (0)                                                          | 0 (0)                                  | 3 (60)                                | 2 (40)      |
| <b>4</b>                            | 2  | 0 (0)                                                          | 1 (50)                                 | 1 (50)                                | 0 (0)       |
| <b>p-value (trend)</b>              |    | 0.26                                                           | 0.96                                   | 0.40                                  | 0.53        |
| <b>Recurrent AF patients (n=13)</b> |    |                                                                |                                        |                                       |             |
| <b>0</b>                            | 4  | 0 (0)                                                          | 0 (0)                                  | 3 (75)                                | 1 (25)      |
| <b>1</b>                            | 2  | 0 (0)                                                          | 0 (0)                                  | 2 (100)                               | 0 (0)       |
| <b>2</b>                            | 3  | 1 (33)                                                         | 0 (0)                                  | 2 (67)                                | 0 (0)       |
| <b>3</b>                            | 3  | 0 (0)                                                          | 0 (0)                                  | 1 (33)                                | 2 (67)      |
| <b>4</b>                            | 1  | 0 (0)                                                          | 0 (0)                                  | 1 (100)                               | 0 (0)       |
| <b>p-value (trend)</b>              |    | 0.76                                                           | -                                      | 0.49                                  | 0.57        |

<sup>1</sup>CHADS2 scoring system: heart failure = 1 point, hypertension requiring treatment = 1 point, age  $\geq$  75 years = 1 point, diabetes mellitus = 1 point, history of stroke or transient ischemic attack = 2 points; add points to determine score. CHADS2 score stroke prevention recommendations: 0 = aspirin 81-325mg; 1 = either aspirin 81-325mg or therapeutic anticoagulation depending on patient preference; 2 or higher = therapeutic anticoagulation.

<sup>2</sup>Anticoagulants prescribed = enoxaparin, rivaroxaban, apixaban, dabigatran, warfarin, heparin

<sup>3</sup>Antiplatelets prescribed = aspirin 81-325mg

<sup>4</sup>p-value is from chi-square test for the trend in the proportions of patients receiving the treatment associated with CHADS2 score

**Supplemental Figure 1: Univariable Analysis for AF Risk factors for CLL patient population (n= 433)**

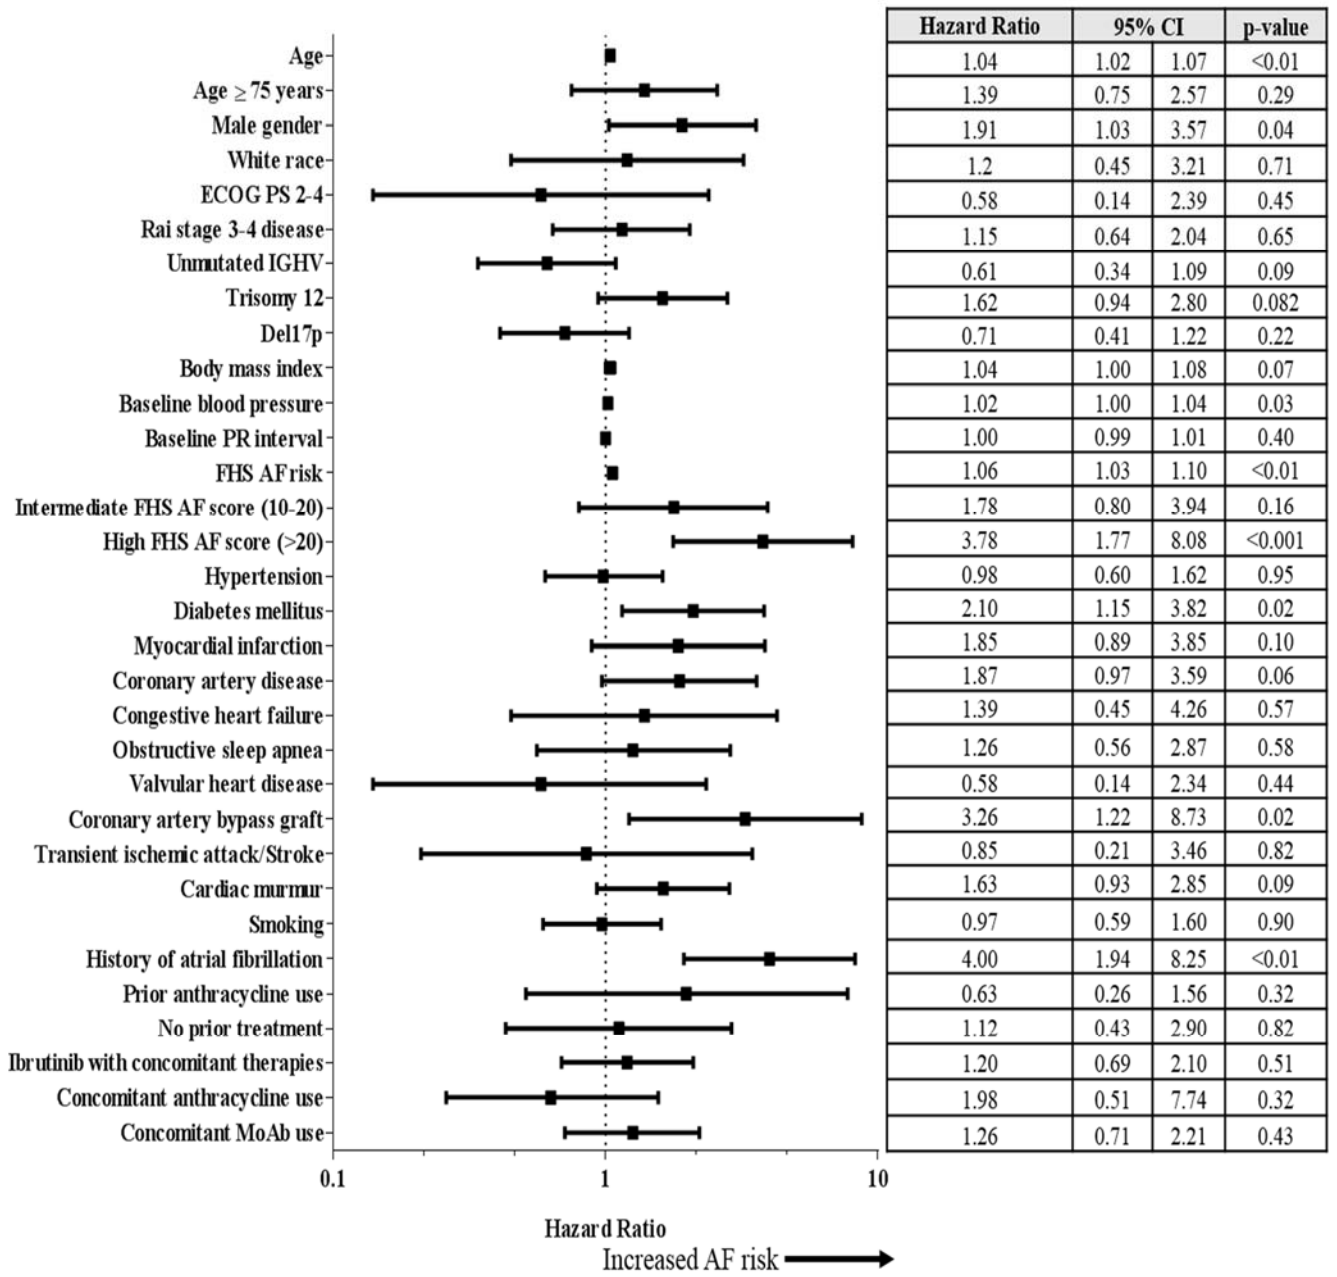



**Supplemental Figure 2: Univariable Analysis for AF Risk factors for entire patient population treated on a clinical trial (n= 472)**

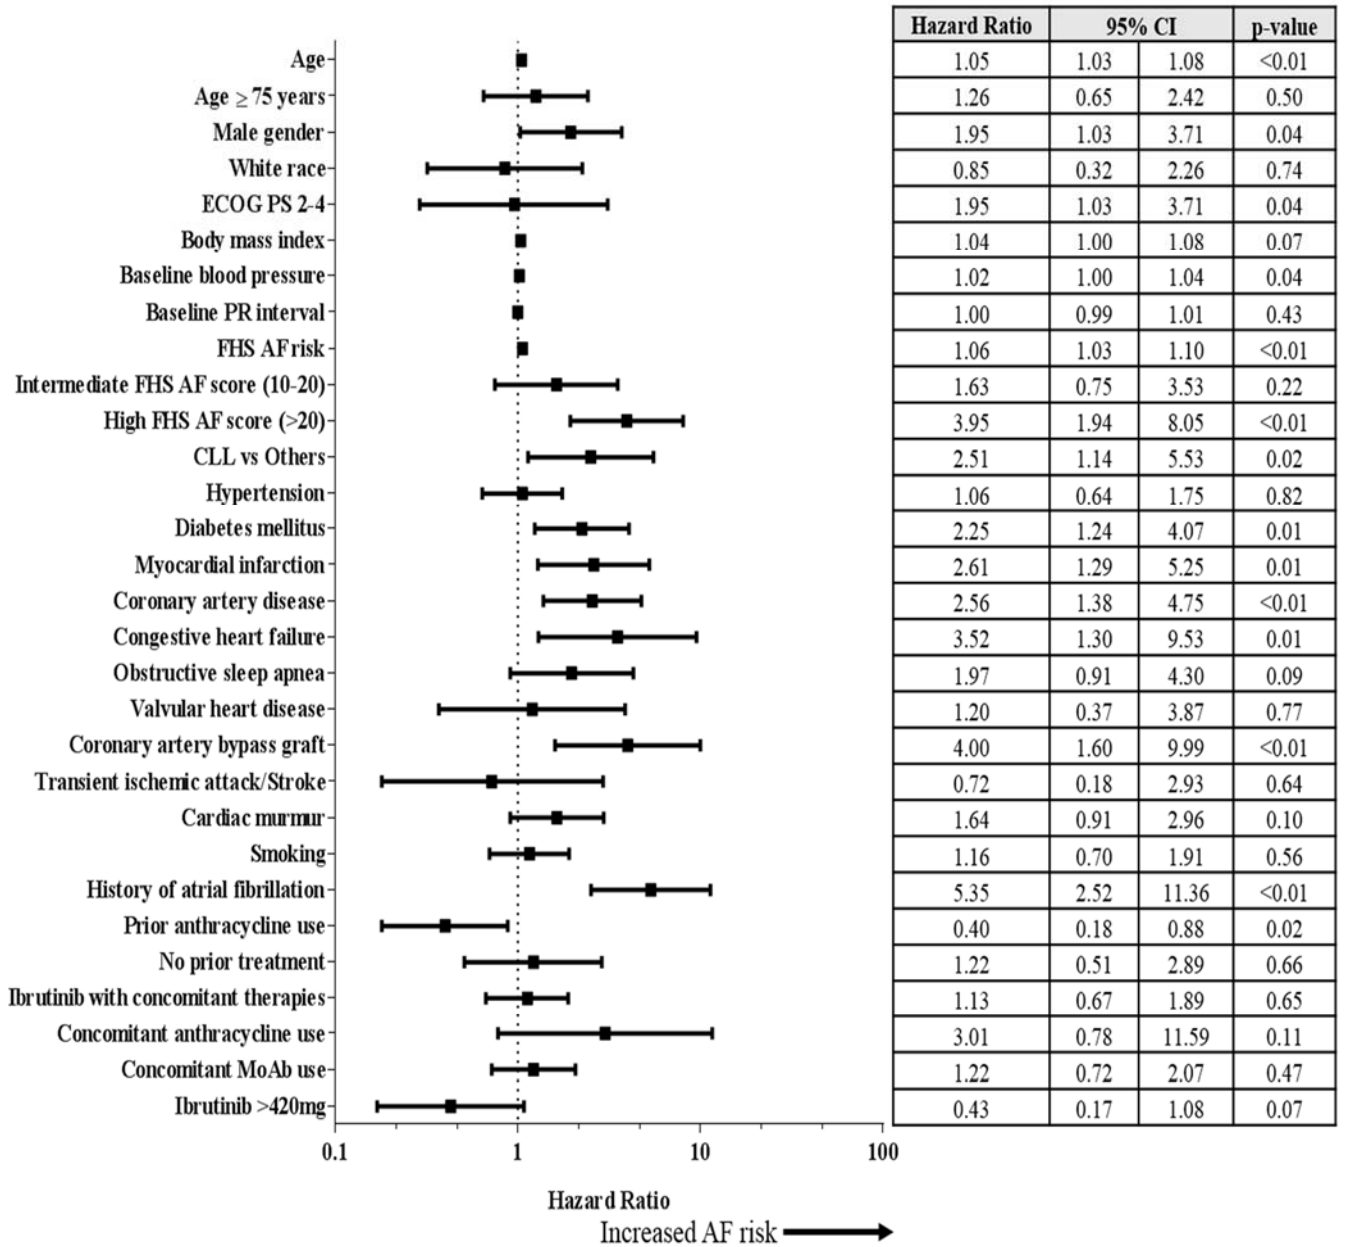

**Supplemental Figure 3: Univariable Analysis for AF Risk factors for patients treated with commercial ibrutinib (n=110)**

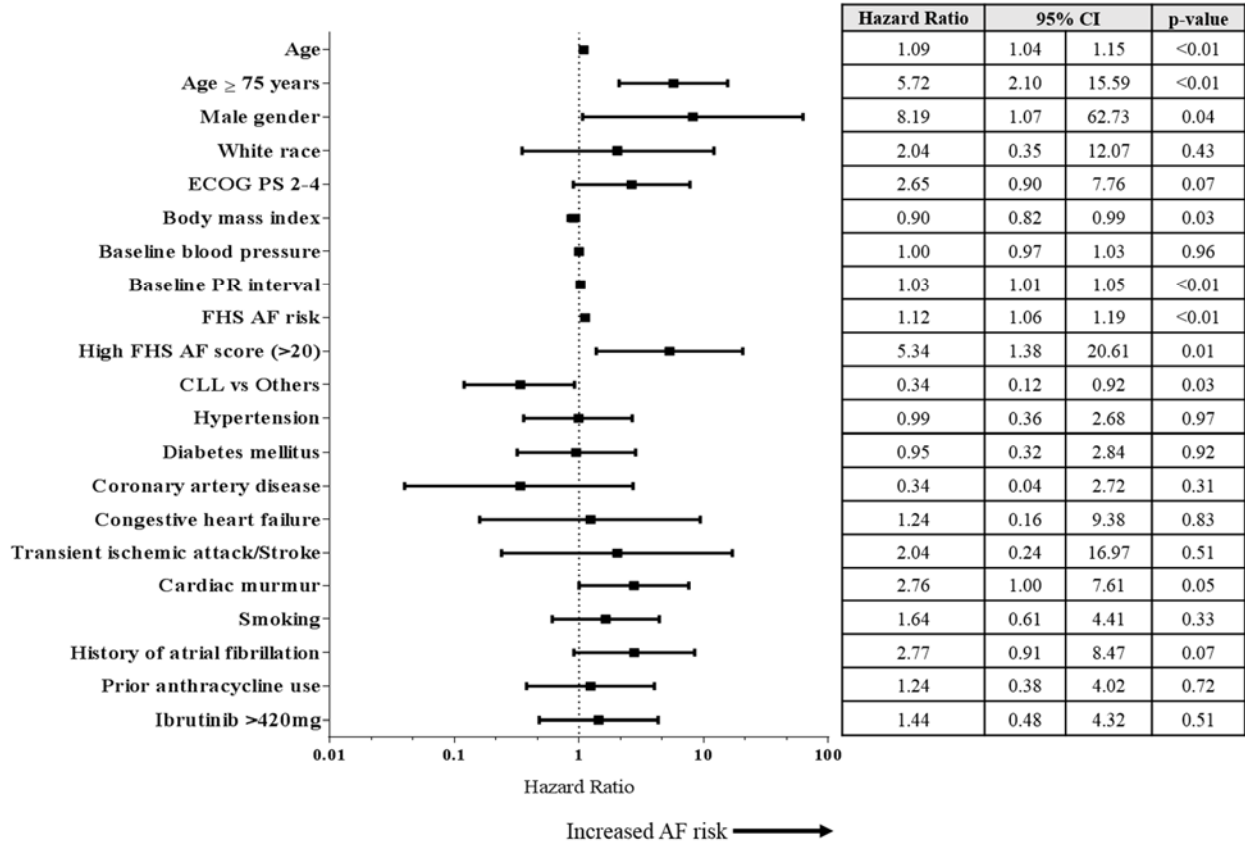

**Supplemental Figure 4: Multivariable Analysis for AF Risk factors for patients treated on a clinical trial (n=472), and with commercial ibrutinib (n=110)**

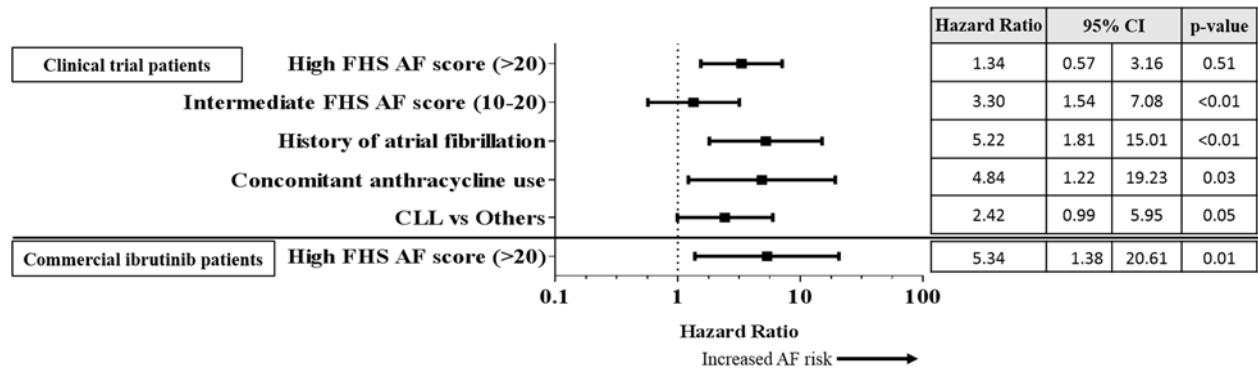

Supplement: ba009720-suppl1.pdf [file ba009720-suppl1.pdf]
